# Supplementary material for: Hepatitis Delta Virus Detected in Salivary Glands of Sjögren's Syndrome Patients and Recapitulates a Sjögren's Syndrome-Like Phenotype in Vivo
Source: PubMed Central journal article supplement (PMC4902173; doi:10.20411/pai.v1i1.72), 2016-05-23
Supplement: NIHMS789515-supplement-Supplemental_Files.pdf [file NIHMS789515-supplement-Supplemental_Files.pdf]

**Supplemental Table 1. Summary of primary Sjögren's syndrome (pSS) and Sicca patient samples utilized in analysis of viral profiles present in Sjögren's syndrome patient cohorts at NIH and in UK.**

| NIH Patient ID | Sex    | Schirmer's Test | Unstimulated Saliva Flow | Focus Score ( $\geq 1$ ) | Autoantibody | Diagnosis |
|----------------|--------|-----------------|--------------------------|--------------------------|--------------|-----------|
| pSS-1          | Male   | Negative        | Low Flow                 | Negative                 | Positive     | pSS       |
| pSS-2          | Female | Positive        | Low Flow                 | Positive                 | Positive     | pSS       |
| pSS-3          | Male   | Positive        | Low Flow                 | Positive                 | Positive     | pSS       |
| pSS-4          | Female | Negative        | Low Flow                 | Positive                 | Positive     | pSS       |
| pSS-6          | Female | Positive        | Low Flow                 | Positive                 | Positive     | pSS       |
| pSS-7          | Male   | Negative        | Low Flow                 | Positive                 | Positive     | pSS       |
| pSS-9          | Female | Positive        | Low Flow                 | Negative                 | Positive     | pSS       |
| pSS-10         | Female | Positive        | Low Flow                 | Positive                 | Positive     | pSS       |
| pSS-11         | Male   | Positive        | Normal Flow              | Positive                 | Positive     | pSS       |
| pSS-12         | Female | Positive        | Low Flow                 | Positive                 | Negative     | pSS       |
| pSS-13         | Female | Positive        | Low Flow                 | Positive                 | Negative     | pSS       |
| pSS-14         | Female | Negative        | Normal Flow              | Positive                 | Positive     | pSS       |
| pSS-15         | Male   | Negative        | Low Flow                 | Positive                 | Positive     | pSS       |
| pSS-19         | Male   | Positive        | Normal Flow              | Positive                 | Positive     | pSS       |
| pSS-20         | Male   | Positive        | Normal Flow              | Positive                 | Positive     | pSS       |
| UK Patient ID  | Sex    | Schirmer's Test | Unstimulated Saliva Flow | Focus Score ( $\geq 1$ ) | Autoantibody | Diagnosis |
| UK-1           | Female | Positive        | Normal Flow              | Positive                 | Positive     | pSS       |
| UK-2           | Male   | Positive        | Normal Flow              | Positive                 | Positive     | pSS       |
| UK-3           | Female | Positive        | Low Flow                 | Positive                 | Positive     | pSS       |
| UK-4           | Female | Positive        | Low Flow                 | Positive                 | Positive     | pSS       |
| UK-5           | Female | Positive        | Low Flow                 | Positive                 | Positive     | pSS       |
| UK-6           | Female | Negative        | Normal Flow              | Positive                 | Positive     | pSS       |
| UK-7           | Female | Positive        | Low Flow                 | Positive                 | Positive     | pSS       |
| UK-8           | Female | Positive        | Low Flow                 | Positive                 | Positive     | pSS       |
| UK-9           | Female | Positive        | Low Flow                 | Positive                 | Positive     | pSS       |
| UK-10          | Female | Positive        | Normal Flow              | Positive                 | Positive     | pSS       |
| UK-11          | Female | Positive        | Normal Flow              | Positive                 | Positive     | pSS       |
| UK-12          | Male   | Positive        | Normal Flow              | Positive                 | Positive     | pSS       |
| UK-13          | Female | Positive        | Low Flow                 | Negative                 | Negative     | Sicca     |
| UK-14          | Female | Negative        | Normal Flow              | Negative                 | Negative     | Sicca     |
| UK-15          | Female | Negative        | Normal Flow              | Negative                 | Negative     | Sicca     |
| UK-16          | Female | Negative        | Normal Flow              | Negative                 | Negative     | Sicca     |
| UK-17          | Female | Positive        | Low Flow                 | Negative                 | Negative     | Sicca     |
| UK-18          | Male   | Positive        | Low Flow                 | Negative                 | Negative     | Sicca     |
| UK-19          | Female | Positive        | Low Flow                 | Negative                 | Negative     | Sicca     |
| UK-20          | Female | Negative        | Normal Flow              | Negative                 | Negative     | Sicca     |
| UK-21          | Female | Positive        | Normal Flow              | Negative                 | Negative     | Sicca     |
| UK-22          | Female | Positive        | Normal Flow              | Negative                 | Negative     | Sicca     |

All pSS patients met diagnosis criteria based on the American European consensus group (AECG).

**Supplemental Table 2. Viral microarray analysis identified 9 viral probes with significantly different intensity between the collective pSS patient population compared to healthy controls.**

| Family Name   | Probe Name                 | Sequence                                                     | p-value | p (Corr) | FC    |
|---------------|----------------------------|--------------------------------------------------------------|---------|----------|-------|
| Deltavirus    | Deltavirus_13277517_18     | GGTCAACCTCCTAAGTTCCTCTTCTCCTCCTTGCTGAGGTTCTTTCCCGCCGATAG     | 0.004   | 0.022    | 3.25  |
| Herpesviridae | Herpesviridae_9629267_432  | GCCCTGGGCCCGAGGCCATCCAGGCGGGCTGGAGGACGTGCGGATCCAGGCCGCGG     | 0.012   | 0.033    | 3.47  |
| Astroviridae  | Astroviridae_20514394_47   | CAACCTCAACCTCAACCTCCTGCTCCTATTGAAGAAATACTTCTGCCTTAGCAGAACTG  | 0.014   | 0.033    | 2.60  |
| Adenoviridae  | Adenoviridae_34303903_34   | TTCACTAAGTTTGCCTCCAGCTCTACAAAAATTTAATTGAAATTTTATTGGAAAATC    | 0.014   | 0.033    | 2.48  |
| Retroviridae  | Retroviridae_9629902_75    | CATTGCAAGTTATTGCGATCATCTCTCCTCCTCGTTGGGGGGCCAGTCAACCAGCTA    | 0.009   | 0.033    | 2.05  |
| Circoviridae  | Circoviridae_12280941_24   | TGCCAACTTTGTAACCCCTCCACCAACTTGGCCTATGACCCCTATATTAECTACTCCTC  | 0.023   | 0.044    | 2.86  |
| Flaviviridae  | Flaviviridae_157781216_244 | TATACCAATGCTGTAACCTTGAACCGGAGGCCAGGAAAGTGATCTCCTCCCTCACGGAGC | 0.003   | 0.022    | -2.10 |
| Poxviridae    | Poxviridae_96980809_55     | GCTCCGCAAGGCGGTTCGAGCGGCAGCTGGAGGAGGAGCAGGAGGTGAAGCTGAAGAGCC | 0.003   | 0.022    | -4.00 |
| Poxviridae    | Poxviridae_96980809_110    | TCGAGCGGCAGCTGGAGGAGGAGCAGGAGGTGAAGCTGAAGAGCTCGCGCGCGGAGT    | 0.016   | 0.033    | -2.93 |

Six probes were increased in pSS compared to healthy controls and 3 probes were significantly decreased in pSS compared to healthy controls. (FC = Fold Change, p-value denotes t-test, p(Corr) denotes p<0.05, t-test, Benjamini-Hochberg correction n=14-15)

**Supplemental Table 3. Analysis of viral microarray data for subgroups within the Sjögren's syndrome patient population identified 12 viral probes significantly increased in at least 25% of the patient co-hort.**

| <b>Viral Family Name</b> | <b>Probe Name</b>           | <b>Sequence</b>                                               |
|--------------------------|-----------------------------|---------------------------------------------------------------|
| Astroviridae             | Astroviridae_20514394_18    | CCAACGACAGGAGCTCAACCTCAACCTCAACCTCCTGCTCCTATTGAAGAAATACTTCTG  |
| Astroviridae             | Astroviridae_20514394_47    | CAACCTCAACCTCAACCTCCTGCTCCTATTGAAGAAATACTTCTGCCTTTAGCAGAACTG  |
| Parvoviridae             | Parvoviridae_51949963_15    | ACACCATCTGGCTGTTTGGACCCGCCACCACCGGCAAGACCAACATTGCGGAAGCCATCG  |
| Adenoviridae             | Adenoviridae_46852402_27    | ACCGCCTCCACCCTGGAGGCCATGCTGCGCAACGACACCAACAACCAACCTTTATTGAC   |
| Circoviridae             | Circoviridae_12280941_24    | TGCCAACTTTGTAACCCCTCCACCAACTTGGCCTATGACCCCTATATTAATACTACTCCTC |
| Herpesviridae            | Herpesviridae_126882977_334 | CAGCCCTCTCAGCCCAAAGCCATTACTAAAGTCCCGTTGTATGTACAAGCGCAAGAGGAA  |
| Picornaviridae           | Picornaviridae_9626123_24   | ATAGCCTACACCCCGCCTGGTGCGGGAAAGCCCACCACCCGGGACCAAGCTATGCAGGCT  |
| Picornaviridae           | Picornaviridae_157939778_31 | TCGAGAGCAACCCTGGCCCTCTGTATGTTTGTCCCAACCAGGTAAGTGCATCCATTC     |
| Herpesviridae            | Herpesviridae_9629267_432   | GCCCTGGGCCCCGAGGCCATCCAGGCGCGGCTGGAGGACGTGCGGATCCAGGCCCGCCGG  |
| Deltavirus               | Deltavirus_13277517_18      | GGTCAACCTCCTAAGTTCCTCTCTCCTCCTTGTGAGGTTCTTTCCCCCGCCGATAG      |
| Flaviviridae             | Flaviviridae_157781208_384  | TTTATCACAGCATGTCTCATGCCCGACCCCGCTATTACTCCTGTGCCTACTCATACTTA   |
| Parvoviridae             | Parvoviridae_51593836_90    | TCAACAAGAGGAACACCGTCTGGCTCTACGGACCCGCCACGACCGGCAAGACCAACATCG  |

Subgroup analysis was performed through identifying normalized probe intensity of each individual patient that was greater than the average +2 standard deviations. Probes selected for further analysis were found in >25% of the pSS samples tested.

**Supplemental Table 4. Significant pairwise correlations identified between probes significantly increased in >25% of the pSS patient population compared to healthy controls.**

| Variable                    | by Variable                 | Correlation | Count | Lower 95% | Upper 95% | Signif Prob |
|-----------------------------|-----------------------------|-------------|-------|-----------|-----------|-------------|
| Deltavirus_13277517_18      | Astroviridae_20514394_47    | 0.9268      | 15    | 0.7892    | 0.9758    | <.0001      |
| Flaviviridae_157781208_384  | Parvoviridae_51949963_15    | 0.9121      | 15    | 0.7506    | 0.9708    | <.0001      |
| Parvoviridae_51593836_90    | Picornaviridae_9626123_24   | 0.9097      | 15    | 0.7443    | 0.97      | <.0001      |
| Parvoviridae_51593836_90    | Flaviviridae_157781208_384  | 0.9056      | 15    | 0.7336    | 0.9685    | <.0001      |
| Flaviviridae_157781208_384  | Picornaviridae_9626123_24   | 0.8666      | 15    | 0.6373    | 0.9549    | <.0001      |
| Circoviridae_12280941_24    | Astroviridae_20514394_18    | 0.8614      | 15    | 0.6248    | 0.9531    | <.0001      |
| Parvoviridae_51593836_90    | Parvoviridae_51949963_15    | 0.8607      | 15    | 0.6231    | 0.9528    | <.0001      |
| Circoviridae_12280941_24    | Astroviridae_20514394_47    | 0.8038      | 15    | 0.4956    | 0.9322    | 0.0003      |
| Deltavirus_13277517_18      | Circoviridae_12280941_24    | 0.8094      | 15    | 0.5076    | 0.9343    | 0.0003      |
| Astroviridae_20514394_47    | Astroviridae_20514394_18    | 0.7947      | 15    | 0.4764    | 0.9288    | 0.0004      |
| Parvoviridae_51593836_90    | Herpesviridae_9629267_432   | 0.7615      | 15    | 0.4087    | 0.9163    | 0.001       |
| Herpesviridae_9629267_432   | Parvoviridae_51949963_15    | 0.7122      | 15    | 0.3148    | 0.8972    | 0.0029      |
| Herpesviridae_9629267_432   | Picornaviridae_157939778_31 | -0.7074     | 15    | -0.8952   | -0.306    | 0.0032      |
| Picornaviridae_9626123_24   | Parvoviridae_51949963_15    | 0.7059      | 15    | 0.3034    | 0.8947    | 0.0033      |
| Deltavirus_13277517_18      | Parvoviridae_51949963_15    | -0.6949     | 15    | -0.8903   | -0.2837   | 0.004       |
| Deltavirus_13277517_18      | Astroviridae_20514394_18    | 0.6884      | 15    | 0.2721    | 0.8877    | 0.0045      |
| Flaviviridae_157781208_384  | Deltavirus_13277517_18      | -0.6727     | 15    | -0.8813   | -0.2447   | 0.006       |
| Flaviviridae_157781208_384  | Herpesviridae_9629267_432   | 0.6656      | 15    | 0.2326    | 0.8784    | 0.0068      |
| Parvoviridae_51949963_15    | Astroviridae_20514394_47    | -0.6512     | 15    | -0.8724   | -0.2084   | 0.0086      |
| Parvoviridae_51593836_90    | Deltavirus_13277517_18      | -0.6162     | 15    | -0.8577   | -0.1519   | 0.0144      |
| Herpesviridae_9629267_432   | Picornaviridae_9626123_24   | 0.5904      | 15    | 0.112     | 0.8466    | 0.0205      |
| Flaviviridae_157781208_384  | Astroviridae_20514394_47    | -0.5871     | 15    | -0.8452   | -0.107    | 0.0214      |
| Herpesviridae_9629267_432   | Herpesviridae_126882977_334 | 0.5414      | 15    | 0.0403    | 0.8249    | 0.0371      |
| Picornaviridae_157939778_31 | Parvoviridae_51949963_15    | -0.5293     | 15    | -0.8194   | -0.0233   | 0.0425      |
| Flaviviridae_157781208_384  | Picornaviridae_157939778_31 | -0.5287     | 15    | -0.8191   | -0.0225   | 0.0428      |
| Deltavirus_13277517_18      | Picornaviridae_9626123_24   | -0.5253     | 15    | -0.8176   | -0.0179   | 0.0443      |

Significant pairwise correlations between viral probes revealed two distinct viral profiles present within the pSS patient population. (PCC, n=15, p<0.05. Table is ranked on statistical significance of correlation.

**A.**

```

HDV_M21012_nt883-nt1287      GAGATGCCATGCCGACCCGAAAGAGGAAAGAGGACGCGAGACGCAAACT 50
pSS-20                        GAGATGCCATGCCGACCCGAAAGAGGAAAGAGGACGCGAGACGCAAACT 50
pSS-3                          GAGATGCCATGCCGACCCGAAAGAGGAAAGAGGACGCGAGACGCAAACT 50
pSS-9                          GAGATGCCATGCCGACCCGAAAGAGGAAAGAGGACGCGAGACGCAAACT 50
pSS-7                          TAGATGCCATGCCGACCCGAAAGAGGAAAGAGGACGCGAGACGCAAACT 50
*****

HDV_M21012_nt883-nt1287      GTGAGTGGAAACCCGCTTTATTCACCTGGGTCGACAACTCTGGGGAGAAA 100
pSS-20                        GTGAGTGGAA-CCCGCTTTATTCACCTGGGTCGACAACTCTGGGGAGAAA 99
pSS-3                          GTGAGTGGNAACCCGCTTTATTCACCTGGGTCGACAACTCTGGGGAGAAA 100
pSS-9                          GTGAGTGGNAACCCGCTTTATTCACCTGGGTCGACAACTCTGGGGAGAAA 100
pSS-7                          GTGAGTGGNAACCCGCTTTATTCACCTGGGTYGACAACTYTGGGGAGAAA 100
*****

HDV_M21012_nt883-nt1287      AGGCGGATCGGCTGGGAAGAGTATATCCCTATGGAAATCCCTGGTTTCCC 150
pSS-20                        AGGCGGATCGGCTGGGAAGAGTATATCCCTATGGAAATCCCTGGTTTCCC 149
pSS-3                          AGGCGGATCGGCTGGGAAGAGTATATCCCTATGGAAATCCCTGGTTTCCC 150
pSS-9                          AGGCGGATCGGCTGGGAAGAGTATATCCCTATGGAAATCCCTGGTTTCCC 150
pSS-7                          AGGCGGATYGGCTGGGAAGAGTATATCCCTATGGAAATCCCTGGTTTCCC 150
*****

HDV_M21012_nt883-nt1287      CTGATGTCAGCCCTCCCGGTCGAGAGAAGGGGACTCCGGGACTCC 200
pSS-20                        CTGATGTCAGCCCTCCCGGTCGAGAGAAGGGGACTCCGGGACTCC 199
pSS-3                          CTGATGTCAGCCCTCCCGGTCGAGAGAAGGGGACTCCGGGACTCC 200
pSS-9                          CTGATGTCAGCCCTCCCGGTCGAGAGAAGGGGACTCCGGGACTCC 200
pSS-7                          CTGATGTCAGCCCTCCCGGTCGAGAGAAGGGGACTCCGGGACTCC 200
*****

HDV_M21012_nt883-nt1287      CTGCAGATTGGGACGAAGCCGCCCCGGGCGCTCCCTCGATCCACCTT 250
pSS-20                        CTGCAGATTGGGACGAAGCCGCCCCGGGCGCTCCCTCGATCCACCTT 249
pSS-3                          CTGSAGATTGGGACGAAGCCGCCCCGGGCGCTCCCTCGATCCACCTT 250
pSS-9                          CTGCAGATTGGGACGAAGCCGCCCCGGGCGCTCCCTCGATCCACCTT 250
pSS-7                          CTGCMGATTGGGACGAARCCSCCCCCGGGCGCTCCCTCGATCCACCTT 250
***

HDV_M21012_nt883-nt1287      CGAGGGGTTACACCCCCAACCGGGCGGCTACTCTCTTTCCCTT 300
pSS-20                        CGAGGGGTTACACCCCCAACCGGGCGGCTACTCTCTTTCCCTT 299
pSS-3                          CGAGGGGTTACACCCCCAACCGGGCGGCTACTCTCTTTCCCTT 300
pSS-9                          CGAGGGGTTACACCCCCAACCGGGCGGCTACTCTCTTTCCCTT 300
pSS-7                          CGAGGGGTTACACCCCCAACCGGGCGGCTACTCTCTTTCCCTT 300
*****

HDV_M21012_nt883-nt1287      CTCTCGTCTTCCTCGGTCAACCTCCTGAGTCTCTCTCTCTCTCTCTGCT 350
pSS-20                        CTCTCGTCTTCCTCGGTCAACCTCCTGAGTCTCTCTCTCTCTCTCTGCT 349
pSS-3                          CTCTCGTCTTCCTCGGTCAACCTCCTGARTCTCTCTCTCTCTCTCTGCT 350
pSS-9                          CTCTCGTCTTCCTCGGTCAACCTCCTGAGTCTCTCTCTCTCTCTCTGCT 350
pSS-7                          CTCTCGTCTTCCTCGGTCAACCTCCTGAGTCTCTCTCTCTCTCTCTGCT 350
*****

HDV_M21012_nt883-nt1287      GAGGTCTTGCTCCCGCCGATAGCTGCTTCTTCTTCTCTCGAGGGCCT 400
pSS-20                        GAGG-TCTTGCTCCCGCCGATAGCTGCTTCTTCTTCTCTCGAGGGCCT 398
pSS-3                          GNA GTCTTGCTCCCGCCGATAGCTGCTTCTTCTTCTCTCGAGGGCCT 400
pSS-9                          CTGKTCTTGCTCCCGCCGATAGCTGCTTCTTCTTCTCTCGAGGGCCT 400
pSS-7                          GAGGTCTTGCTCCCGCCGATAGCTGCTTCTTCTTCTCTCAAGGGCCT 400
*

HDV_M21012_nt883-nt1287      TCCTT 405
pSS-20                        TCCTT 403
pSS-3                          TCCTT 405
pSS-9                          TCCTT 405
pSS-7                          TCCTT 405
*****

```

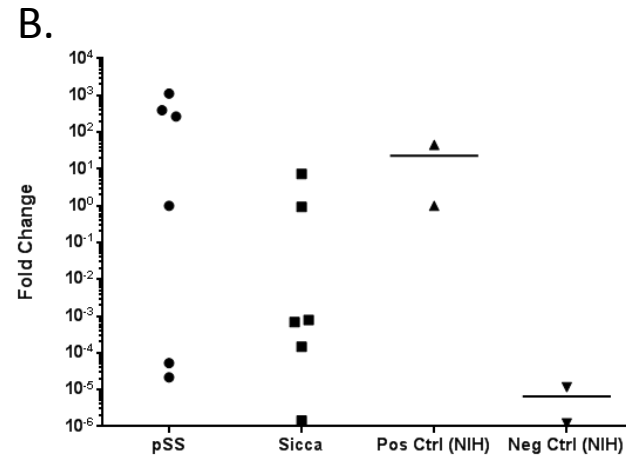

**Supplemental Figure 1. HDV sequence was detected in salivary glands obtained from pSS and sicca patients.** A) Nested PCR was used to detect HDV genomic sequence in minor salivary gland tissue. Sequence homology (98.5% (97.3%-99.3%)) was observed within nested PCR. B) Nested qPCR retargeted to the region encompassing HDAg transcript and genome was used to confirm the viral sequence present in a second pSS cohort and in a selection of patients experiencing sicca symptoms but did not meet full criteria for diagnosis. Two samples identified as positive and two samples identified as negative by qPCR performed on UK co-hort were independently processed and utilized as positive and negative controls in independent confirmation of HDV by nested qPCR in additional UK co-hort.

**Supplemental Table 5. Evidence of past or current hepatitis B virus (HBV) infection or antibodies to HDV not detected in HDV positive pSS patients.**

| <b>Detection by Elisa</b> | <b>Healthy Controls (%)</b> | <b>primary Sjögren's syndrome (%)</b> |
|---------------------------|-----------------------------|---------------------------------------|
| HBsAg                     | 0/11 (0%)                   | 0/13 (0%)                             |
| Anti-HBc Elisa            | 1/8( 12.5%)                 | 1/13 (7.7%)#                          |
| Anti-HBc LIPS             | 2/7(28.6%)                  | 1/12(8.3%)#                           |
| Anti-HDAg Elisa           | 0/8 (0%)                    | 0/21(0%)                              |
| Anti-HDAg LIPS            | 0/7(0%)                     | 0/10(0%)                              |

Antibodies to HDAg and Hepatitis B virus core (HBc) and HBV surface antigen (HBsAg) were quantified in serum by ELISA and the LIPS assay. #The pSS patient positive for anti-HBc was negative for HDV within the salivary gland.

**Supplemental Table 6. Analysis of Hepadnaviridae probes on viral microarray did not find evidence of HBV differentially expressed in pSS or in pSS that possessed HDV in salivary gland tissue relative to healthy controls.**

| Family Name    | Probe Name                  | pSS versus Healthy Controls |       | HDV+pSS versus Healthy Controls |       | HDV- pSS versus Healthy Controls |       |
|----------------|-----------------------------|-----------------------------|-------|---------------------------------|-------|----------------------------------|-------|
|                |                             | p (Corr)                    | FC    | p (Corr)                        | FC    | p (Corr)                         | FC    |
| Hepadnaviridae | Hepadnaviridae_9626719_104  | 0.92                        | 1.05  | 0.80                            | 1.33  | 0.84                             | -1.34 |
| Hepadnaviridae | Hepadnaviridae_48696569_109 | 0.88                        | -1.25 | 0.80                            | -1.69 | 0.85                             | 1.26  |
| Hepadnaviridae | Hepadnaviridae_48696604_116 | 0.84                        | -1.44 | 0.80                            | -1.52 | 0.85                             | -1.34 |
| Hepadnaviridae | Hepadnaviridae_22256030_12  | 0.72                        | -1.23 | 0.80                            | -1.21 | 0.84                             | -1.26 |
| Hepadnaviridae | Hepadnaviridae_9630370_13   | 0.51                        | -1.91 | 0.62                            | -2.02 | 0.84                             | -1.75 |
| Hepadnaviridae | Hepadnaviridae_21326584_14  | 0.88                        | -1.15 | 0.91                            | 1.08  | 0.84                             | -1.59 |
| Hepadnaviridae | Hepadnaviridae_9630370_14   | 0.77                        | 1.59  | 0.88                            | 1.27  | 0.78                             | 2.21  |
| Hepadnaviridae | Hepadnaviridae_9630370_15   | 0.88                        | 1.20  | 0.80                            | 1.42  | 0.91                             | -1.08 |
| Hepadnaviridae | Hepadnaviridae_21326584_16  | 0.72                        | -2.05 | 0.80                            | -2.60 | 0.85                             | -1.43 |
| Hepadnaviridae | Hepadnaviridae_21326584_16  | 0.72                        | 1.38  | 0.80                            | 1.37  | 0.84                             | 1.38  |
| Hepadnaviridae | Hepadnaviridae_9628827_17   | 0.77                        | 1.13  | 0.92                            | -1.02 | 0.54                             | 1.38  |
| Hepadnaviridae | Hepadnaviridae_48696604_18  | 0.91                        | -1.23 | 0.80                            | -1.53 | 0.91                             | 1.13  |
| Hepadnaviridae | Hepadnaviridae_9626719_20   | 0.72                        | 1.50  | 0.80                            | 1.63  | 0.85                             | 1.31  |
| Hepadnaviridae | Hepadnaviridae_9630370_20   | 0.72                        | -1.15 | 0.88                            | -1.06 | 0.78                             | -1.31 |
| Hepadnaviridae | Hepadnaviridae_21326584_21  | 0.77                        | -1.77 | 0.80                            | -2.07 | 0.85                             | -1.39 |
| Hepadnaviridae | Hepadnaviridae_22256030_22  | 0.76                        | 1.29  | 0.80                            | 1.45  | 0.86                             | 1.08  |
| Hepadnaviridae | Hepadnaviridae_9628827_22   | 0.45                        | 1.52  | 0.27                            | 1.74  | 0.78                             | 1.24  |
| Hepadnaviridae | Hepadnaviridae_9630370_23   | 0.91                        | -1.16 | 0.92                            | 1.06  | 0.85                             | -1.60 |
| Hepadnaviridae | Hepadnaviridae_22256030_29  | 0.51                        | 1.36  | 0.55                            | 1.51  | 0.84                             | 1.15  |
| Hepadnaviridae | Hepadnaviridae_9628827_29   | 0.45                        | 1.52  | 0.27                            | 1.79  | 0.84                             | 1.18  |
| Hepadnaviridae | Hepadnaviridae_9628827_3    | 0.72                        | 1.34  | 0.80                            | 1.23  | 0.53                             | 1.53  |
| Hepadnaviridae | Hepadnaviridae_9630370_3    | 0.98                        | 1.01  | 0.91                            | 1.11  | 0.85                             | -1.15 |
| Hepadnaviridae | Hepadnaviridae_9628827_8    | 0.91                        | 1.07  | 0.80                            | -1.36 | 0.54                             | 1.87  |
| Hepadnaviridae | Hepadnaviridae_9630370_8    | 0.92                        | 1.06  | 0.91                            | 1.11  | 0.99                             | -1.01 |
| Hepadnaviridae | Hepadnaviridae_21326584_9   | 0.72                        | 1.51  | 0.80                            | 1.84  | 0.85                             | 1.12  |
| Hepadnaviridae | Hepadnaviridae_22256030_9   | 0.77                        | 1.25  | 0.88                            | -1.12 | 0.48                             | 2.06  |
| Hepadnaviridae | Hepadnaviridae_9630370_9    | 0.88                        | 1.22  | 0.80                            | 1.54  | 0.85                             | -1.17 |

Evaluation of HBV transcripts as detected by the viral microarray showed no significant difference in HBV transcripts levels between pSS patient samples and healthy controls showed. Evaluation of just the 9 samples that presented with HDV probe intensity above the 99%CI of HDV probe intensity of the healthy controls did not reveal a differential expression in pSS with HDV in salivary gland tissue compared to healthy controls. No significant difference in HBV probe intensity was noted between the HDV-negative pSS patients and healthy controls. (n=14-15, ttest, Benjamini-Hochberg correction (p Corr), was utilized to calculate statistical significance. FC = fold change)

**Supplemental Table 7. Correlations between clinical parameters and HDV levels in minor salivary gland biopsy.**

| <b>Variable</b>                  | <b>By Variable</b> | <b>Correlation</b> | <b>Signif Prob</b> |
|----------------------------------|--------------------|--------------------|--------------------|
| Anti-ANA Antibody                | HDV                | 0.4475             | 0.0420*            |
| Anti-SSA/Ro Antibody             | HDV                | 0.5082             | 0.0187*            |
| Anti-SSB/La Antibody             | HDV                | -0.0398            | 0.8639             |
| Albumin                          | HDV                | -0.0624            | 0.7937             |
| Aspartate Aminotransferase (AST) | HDV                | -0.1075            | 0.6519             |
| Alanine Aminotransferase (ALT)   | HDV                | -0.2411            | 0.3058             |
| Alkaline Phosphatase (ALP)       | HDV                | -0.277             | 0.2372             |

Select autoantibodies in serum significantly correlated with levels of HDV detected in minor salivary glands of healthy volunteers compared to patients diagnosed with primary Sjögren's syndrome. Levels of ANA and Anti-SSA/Ro antibody significantly correlated with levels of HDV as determined by microarray detection. Liver function tests, including measurement of serum aspartate aminotransferase (AST) and alanine aminotransferase (ALT) were all within normal range (data not shown) and did not significantly correlate with levels of HDV detected in salivary gland tissue. (PCC, \*p<0.05, n=21-23).



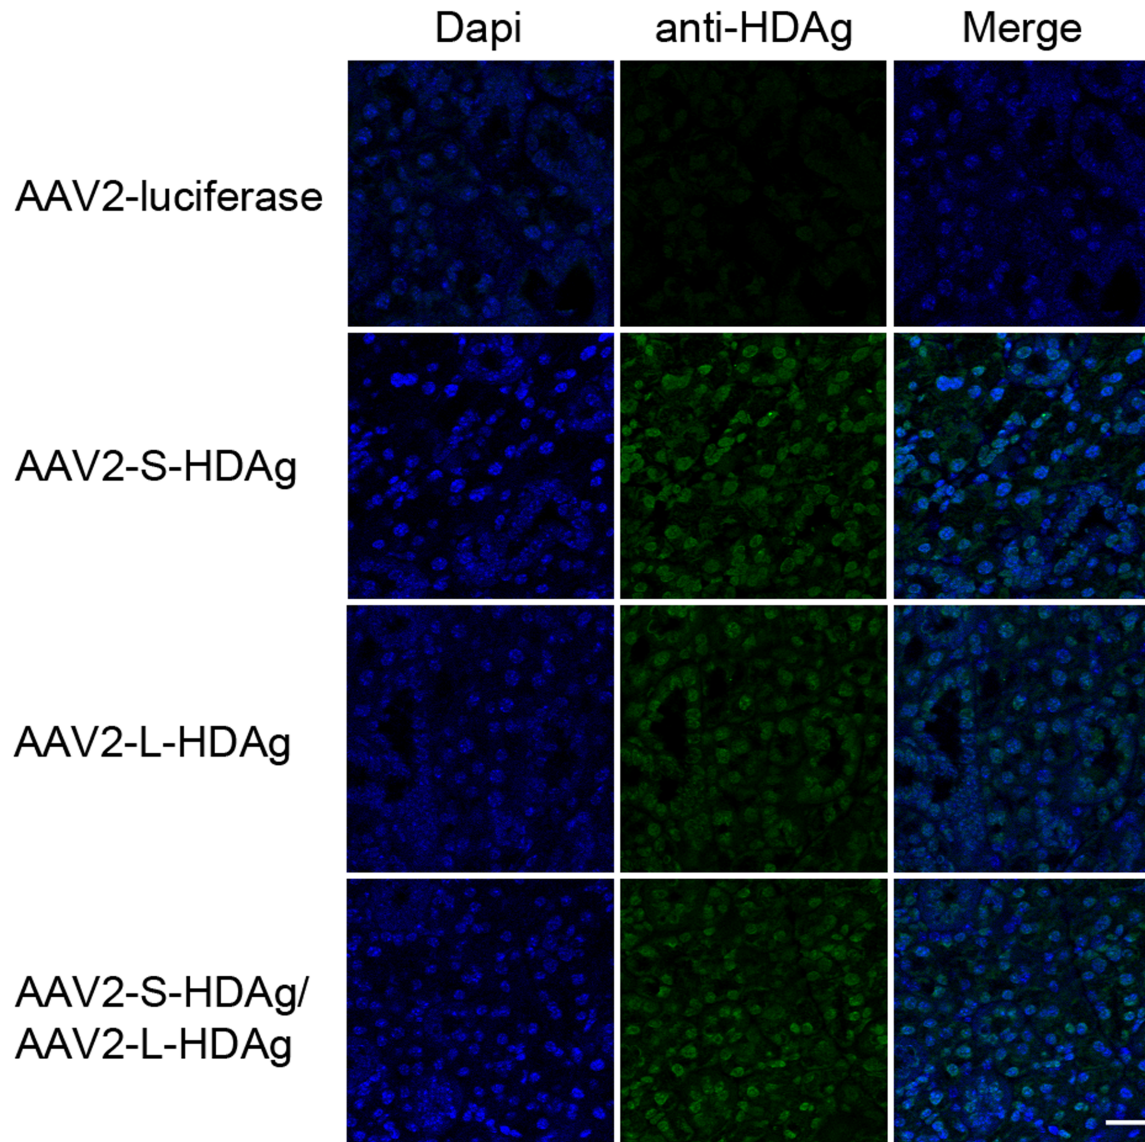

**Supplemental Figure 2. Detection of HDAg in mouse salivary gland tissue in mice cannulated with AAV-HDAg.**

Retrograde cannulation was used to delivery recombinant adeno-associated virus serotype 2 (rAAV-2) containing HDV genes to salivary gland tissue in female C57BL/6 mice. Salivary gland tissue was evaluated 4 months post cannulation for expression of HDAg (green), and dapi (blue) for nuclear localization. Scale bar 20 $\mu$ m

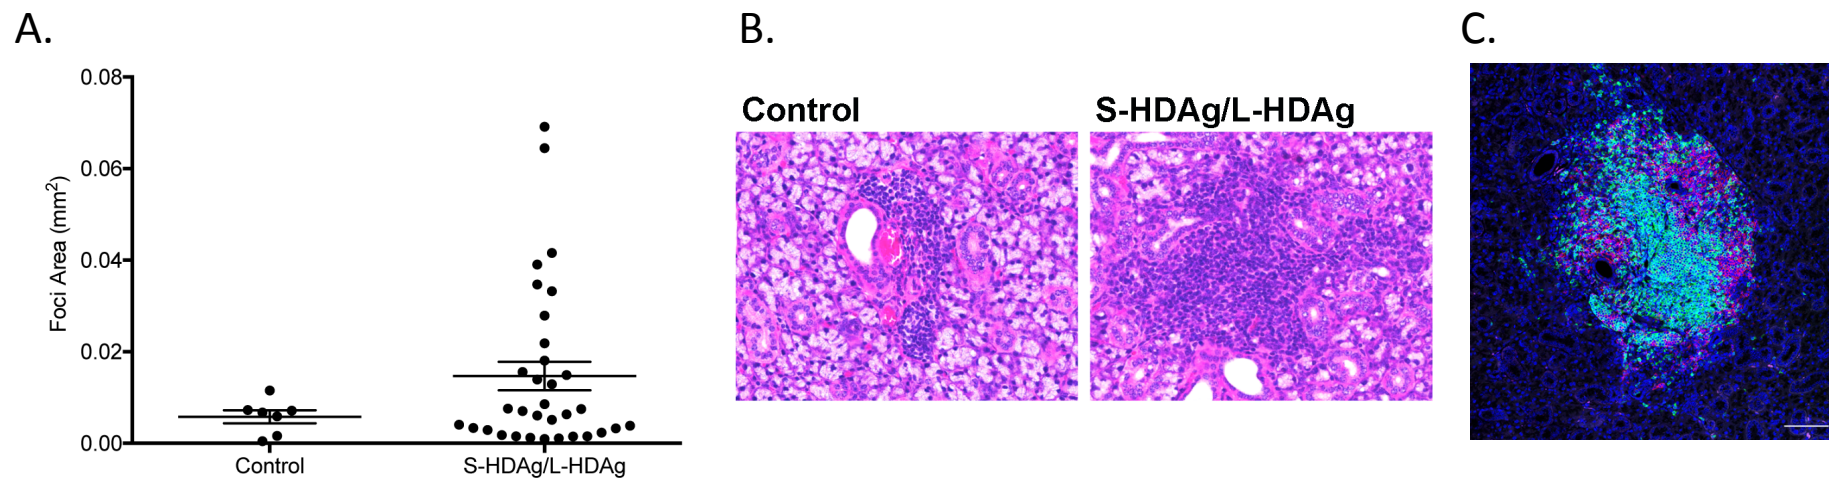

**Supplemental Figure 3. Focal size of lymphocytic infiltrates were larger in mice expressing the combined S-HDAg and L-HDAg compared to foci size observed in mice expressing S-HDAg/L-HDAg in salivary gland tissue.**

A) Area of foci in mice expression a combination of both the small and large HDV antigen revealed an increase in size a subset of the observed foci (n.s., n=7-33). There was a significant increase in variance of size in the treated mice compared to the control mice (F-test,  $p=0.0008$ ). B) Lymphocytic foci representative of the average size of foci present in control mice that expressed luciferase in salivary gland tissue ( $2.5E-3 \text{ mm}^2$ ). Average size of foci in the mice expressing S-HDAg/L-HDAg is  $13.1E-3 \text{ mm}^2$  in control mice. Images of lymphocytic foci representative of the average size of foci present. C) Ectopic lymphoid structures were evident in mice expressing combined S-HDAg/L-HDAg. Distribution of T-cell CD3 (green) and B-cell B220 (red) depict transition to organized lymphoid-like structures (bar 100um).
